# Using Flow Cytometry and Multistage Machine Learning to Discover Label-Free Signatures of Algal Lipid Accumulation

Mohammad Tanhaemami<sup>1</sup>, Elaheh Alizadeh<sup>1</sup>, Claire Sanders<sup>2</sup>, Babetta L. Marrone<sup>2</sup>, Brian Munsky<sup>1,3,\*</sup>

**Abstract**—Most applications of flow cytometry or cell sorting rely on the conjugation of fluorescent dyes to specific biomarkers. However, labeled biomarkers are not always available, they can be costly, and they may disrupt natural cell behavior. Label-free quantification based upon machine learning approaches could help correct these issues, but label replacement strategies can be very difficult to discover when applied labels or other modifications in measurements inadvertently modify intrinsic cell properties. Here we demonstrate a new, but simple approach based upon feature selection and linear regression analyses to integrate statistical information collected from both labeled and unlabeled cell populations and to identify models for accurate label-free single-cell quantification. We verify the method’s accuracy to predict lipid content in algal cells (*Picochlorum soloecismus*) during a nitrogen starvation and lipid accumulation time course. Our general approach is expected to improve label-free single-cell analysis for other organisms or pathways, where biomarkers are inconvenient, expensive, or disruptive to downstream cellular processes.

**Keywords**—Single cell, flow cytometry, machine learning, label-free quantification, microalgae

## I. INTRODUCTION

There are many biological research tasks for which it is important to measure single-cell behavior [1]. These tasks, which include cell counting, cell sorting, and biomarker detection, are widely conducted using flow cytometry (FCM) [1–3]. Flow cytometry is a high throughput analysis technique that performs rapid multiparametric analyses to inspect and quantify large cell populations and subpopulations [2–9]. FCM analysis is usually conducted by first fluorescently labeling cells, and then quantifying fluorescence intensity of individual cells within large populations. Each cell passes through a laser beam to excite fluorophores, and each cell’s data is recorded by measuring emitted fluorescence intensity at longer wavelengths [5,7,9]. FCM also provides indirect measurements of cell phenotypes through measurements of intrinsic cellular properties, such as cell size and shape by forward-angle light scatter (FSC), and information about cellular granularity and morphology by side-scattered light intensity (SSC) [8,10]. In addition to quantifying cell populations,

the related technique of fluorescence-activated cell sorting (FACS) allows researchers to separate cell populations into different subpopulations with respect to their individual properties [8]. As the name implies, sorting decisions are primarily based upon fluorescent labels [1,11].

Despite broad application of fluorescent labels in flow cytometry measurements [10], application of labels can be costly and may require unnecessary effort [12–14]. Labeling can also alter cell behavior and interfere with cellular processes and downstream analyses by causing activating/inhibitory signal transduction [13,15–19]. Additionally, some stains require cellular fixation or are toxic, which limits downstream processing when sorting [18,20]. A label-free quantification strategy could help prevent these adverse consequences by reducing operation costs and efforts, as well as avoiding side effects of using labels on cells [12,15]. In label-free quantification of FCM measurements, computational methods are used to quantify targeted cellular information based on measurements from other channels, i.e., from features.

Current label-free quantification strategies employ various methods of machine learning within their analyses to make use of large flow cytometry datasets [12,13,15,17,21,22]. However, in these strategies, the best intrinsic cellular features have been selected based solely on information collected from *fluorescently labeled* cells (for instance, see [12,21]). For some biological processes, if labels indirectly affect intrinsic cell properties within training populations, then these interactions could result in unexpectedly poor quantification of cell populations when tested on unlabeled cells. We hypothesize that FCM datasets could be used to develop label-free quantification strategies *even when signatures are weak and are perturbed* during the training process. In this work, we test our hypothesis by combining supervised machine learning algorithms with analysis of the distributions of single-cell data and their corresponding fluctuation fingerprints [23].

To demonstrate our approach, we conduct feature selection and regression analysis to find optimized label-free feature combinations and quantify lipid accumulation in microalgae cells, that can usually produce lipid content of 15% to 35% (potentially up to 80%), depending upon cultivation conditions, growth media, and algal species [24–26]. For such microalgae to become sources of alternative fuels, it will be necessary to monitor and maximize their ability to accumulate lipids [27]. To enable such quantification, we

<sup>1</sup>Department of Chemical and Biological Engineering, Colorado State University; Fort Collins, CO, USA.

<sup>2</sup>Bioscience Division, Los Alamos National Laboratory, Los Alamos, NM, USA.

<sup>3</sup>School of Biomedical Engineering, Colorado State University; Fort Collins, CO, USA.

\*Correspondence: munsky@colostate.edu

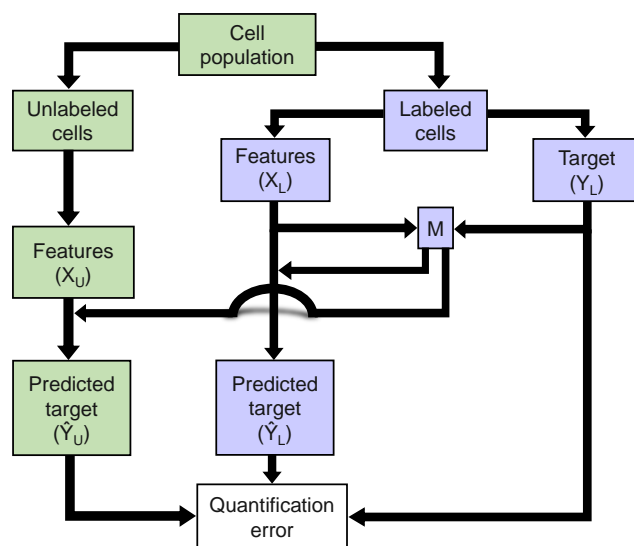

Fig. 1. Flow diagram of preliminary regression analysis to quantify lipid content based using intrinsic (presumably label-free) features. The model is learned using labeled data and then tested on both labeled and unlabeled data.

89 collect and examine FCM measurements of *Picochlorum*  
 90 *soloecismus* under nitrogen replete conditions, and nitrogen  
 91 deplete conditions that will stress cells and induce them  
 92 to accumulate lipids. To measure lipid accumulation, we  
 93 started with a traditional label-based strategy using BOD-  
 94 IPY 505/515 fluorescent dye. We measured cell properties  
 95 with and without the BODIPY stain, and we sought to  
 96 find signatures in the latter preparation that are capable  
 97 of reproducing quantities of the former preparation. Using  
 98 these labeled and unlabeled data, we applied linear and  
 99 nonlinear supervised machine learning algorithms to select  
 100 the most informative features and predict lipid content. As  
 101 opposed to current methods [12,13,15,17,21,22], we show  
 102 that accurate label-free cell quantification requires rigorous  
 103 incorporation of statistical information from biological ex-  
 104 periments using both labeled and label-free measurements.

## 105 II. RESULTS

106 Figure 1 depicts our initial strategy for label-free quan-  
 107 tification. We monitored *P. soloecismus* microalgae for a  
 108 total of 46 days following nitrogen starvation, and measured  
 109 data using FCM at 23 different time points. At each time  
 110 point, we created two identical subsamples as depicted  
 111 at the top of Fig. 1. To obtain ground truth values for  
 112 lipid accumulations, we labeled cells in one subsample  
 113 using BODIPY, and we left the other one unlabeled. We  
 114 measured the BODIPY signal in the labeled sample using  
 115 a BD Accuri™ C6 flow cytometer for 10,000 labeled  
 116 cells per sample. We also collected another set of FCM  
 117 measurements for 60,000 to 136,000 unlabeled cells. Our  
 118 FCM analyses recorded 13 features per cell, including the  
 119 488 nm excitation, 530/30 nm collection channel (FL1)  
 120 corresponding to the BODIPY dye. We sought to predict the  
 121 BODIPY signal intensities using other measured features  
 122 – flow cytometry measurements of forward scatter (FSC),

side scatter (SSC) and other fluorescence wavelengths (FL2  
 488 nm excitation, 585/40 nm collection, FL3 488 nm  
 excitation, 670LP (long pass) collection, and FL4 640 nm  
 excitation, 675/25 nm collection).

As described in the methods section, we sought to  
 identify label-free quantification through several iterative  
 training-validation strategies. First, we conducted a linear  
 regression analysis on FCM measurements of labeled cells  
 (the training step), and then the model was used to predict  
 the lipid content of unlabeled *P. soloecismus* cells. The  
 model was then applied to a different dataset gathered from  
 labeled and unlabeled cells, and we evaluated the prediction  
 accuracy using the Kolmogorov-Smirnov distance.

We performed training on three time points of our data.  
 Time points corresponded to days 1, 14, and 46, which  
 were selected based on the lowest, the middle, and the  
 highest BODIPY signal intensities. We then validated  
 our model on another three time points corresponding to  
 the second lowest, another middle, and the second highest  
 BODIPY signal intensities (days 0, 15, and 37).

Figure 2 shows the results of applying the simple linear  
 regression analysis using labeled data only. Figure 2(a)  
 shows that at each time point the predicted labeled training  
 data has a strong correlation with the measured data.  
 Figure 2(b) suggests that a preliminary regression analysis  
 provides a strong classification for the labeled training data,  
 which was consistent in Fig. 2(c) for validation on labeled  
 cells (KS distances between predictions and measurements  
 for labeled cells were 0.0480, 0.0527, and 0.0190 for the  
 three validation time points). However, the same regression  
 model failed drastically when it was used to estimate the  
 lipid content in the absence of labels, and Fig. 2(d) shows  
 that the difference between predicted and measured values  
 of the lipid content for unlabeled cells is extreme (KS  
 distances were 0.9737, 0.9460 and 0.9233 for the same  
 validation time points as above). Extended results for the  
 linear regression are provided in supplementary Fig. S1.

To address the possibilities that we were overfitting the  
 data or that linear regression was too simple an analysis to  
 extract the informative label-free features, we also applied  
 three more advanced machine learning approaches to learn  
 lipid content from the intrinsic features: (i) *quadratic*,  
 which corresponds to linear regression applied to linear and  
 second order products of the original features (Methods  
 and Fig. S2); (ii) *gradient boosting machine learning*  
 (GBML) as utilized for label-free classification in Blasi et  
 al. [12] (Fig. S3); and finally a *multilayer perceptron neural*  
*network* (MLPNN) [28] as shown in Fig. S4. To reduce  
 effects of over-fitting, the latter two approaches (GBML  
 and MLPNN) both employ cross-validation analysis on random  
 partitions of the labeled training data. However, as shown in  
 Figs. S2-S4, each of these advanced approaches appeared  
 to work very well on the *labeled* training and validation  
 data, but all were insufficient to predict the lipid content  
 for *unlabeled* data.

To explain the failure of the labeled-cell-trained regres-  
 sion model on unlabeled cells, we suspected that some

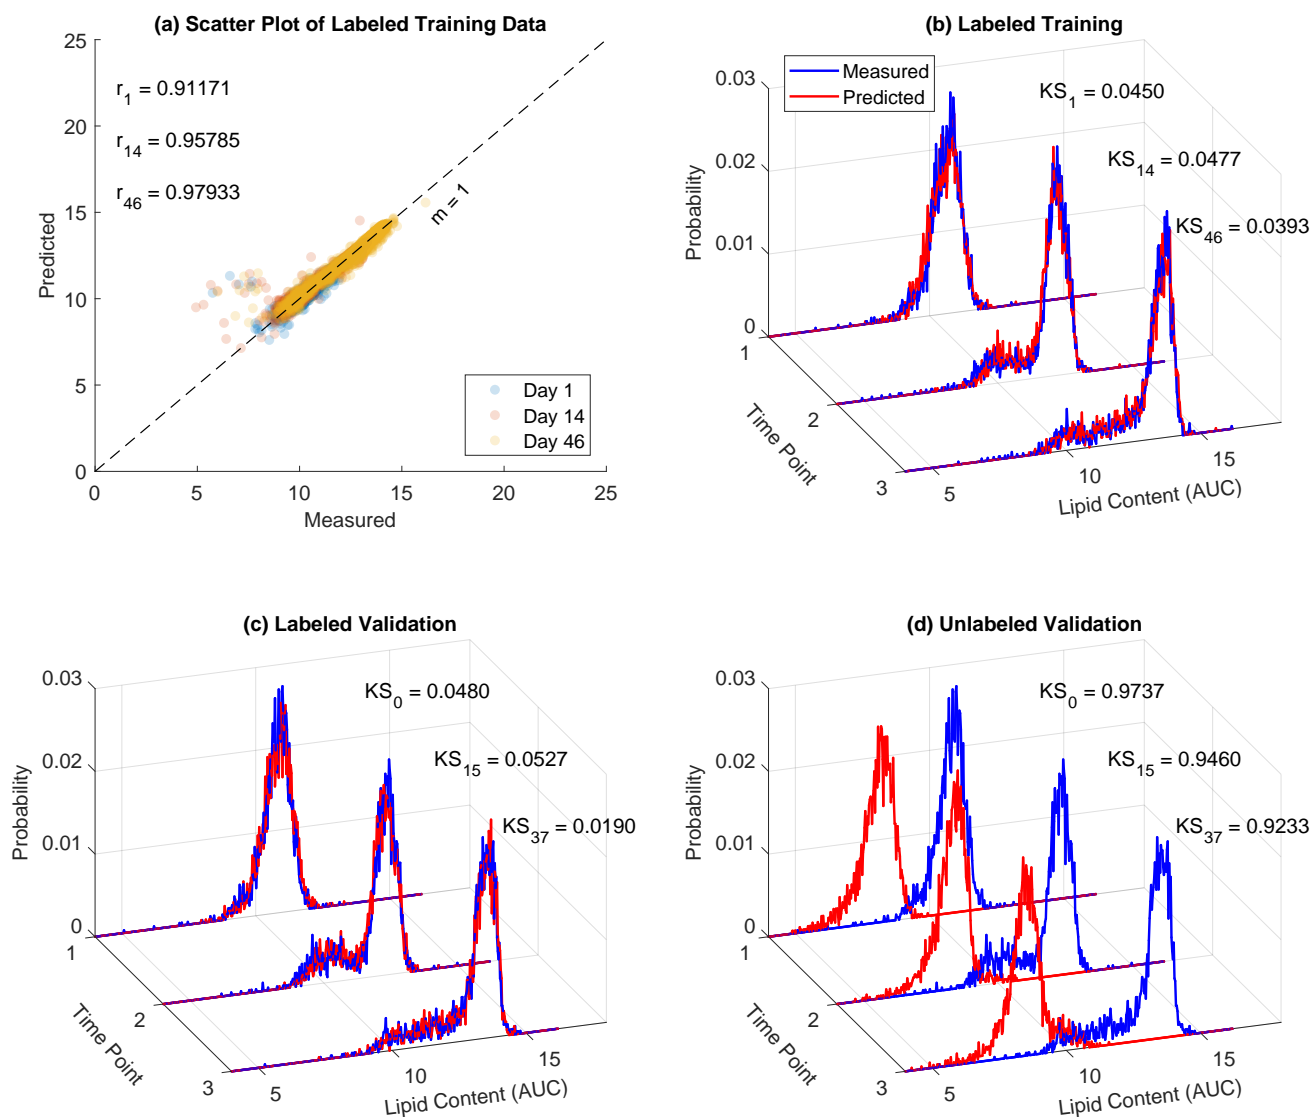

Fig. 2. Preliminary regression analysis. (a) Correlations between measured and predicted values of lipid content for labeled training data. Pearson's correlation coefficients are shown for each time point. (b) Histograms of lipid content for labeled training data. Measured in blue and predicted in red. Kolmogorov-Smirnov distances between the distributions are shown. (c) Histograms of the lipid content for labeled validation data. Training data corresponds to days 1, 14, and 46; validation data corresponds to days 0, 15, and 37. All lipid content measurements are in arbitrary units of concentration (AUC). Bin sizes vary logarithmically.

180 channels in the flow cytometer might be adversely affected  
 181 by application of the BODIPY stain. Indeed, Fig. 3 shows  
 182 that some intrinsic features (FL2-A and FL2-H, correspond-  
 183 ing to the second channel of the flow cytometer) change  
 184 substantially when BODIPY is added to the cells. This  
 185 channel is the closest to the FL1 channel that measures  
 186 the lipid content, where the BODIPY fluorescent dye is  
 187 added. Moreover, it is conceivable that the level of this  
 188 disruption could be correlated with the amount of lipid  
 189 in the cells, which means that it could be equally present  
 190 in both training and validation data for the labeled cells. As  
 191 a result, these changes could disrupt the training and cross-  
 192 validation procedures and account for prediction failure  
 193 when tested on unlabeled cells.

194 To mitigate this effect, we removed features FL2-A and  
 195 FL2-H from the regression analysis and then repeated

196 the linear regression. Figure 4(a-b) shows quantification  
 197 results when the above two features are removed. We  
 198 found that removing corrupted features led to substantial  
 199 improvement for the quantification of unlabeled data (KS  
 200 improved from 0.92-0.97 in Fig. 2(d) to 0.11-0.38 in Fig.  
 201 4(b)). The supplementary Fig. S5 provides extended plots  
 202 of the outcomes of regression analyses upon removal of  
 203 corrupted features. It is interesting to note that removal  
 204 of disrupted features reduces accuracy of lipid prediction  
 205 for labeled cells. This occurs because the labeling inadvertently  
 206 modulates some "intrinsic" features in the labeled cells  
 207 and introduces extraneous feature-target correlations that  
 208 are actually detrimental to predictions for unlabeled cells.  
 209 A troublesome consequence of these correlations between  
 210 labels and intrinsic features is that these disrupted features  
 211 are immune to removal when cross-validation analysis is

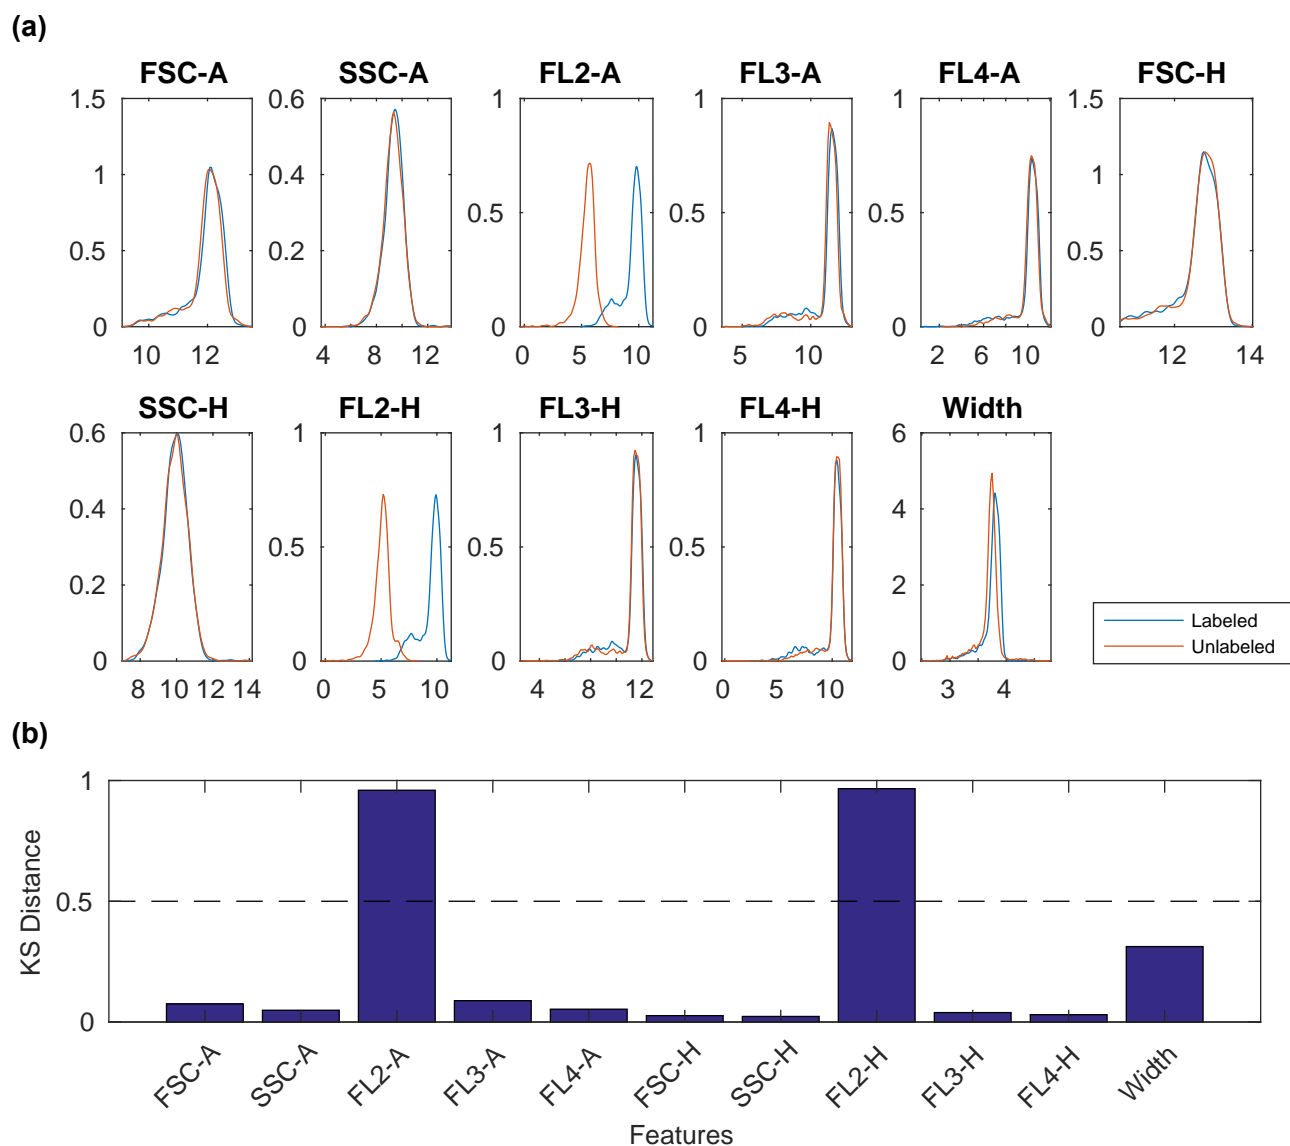

Fig. 3. Comparison of the features with and without BODIPY stain. (a) Kernel densities of features for labeled and unlabeled cells, averaged over all times. Labeled cells are shown in blue, and unlabeled cells are in red. (b) KS distance between labeled and unlabeled features distributions. FL2-A and FL2-H features show clear dependence on the BODIPY stain. Horizontal line denotes threshold used to remove corrupted features.

212 applied exclusively to labeled cells.

213 Next, we used the genetic algorithm on combinations of  
 214 labeled and completely unlabeled data to explore if further  
 215 feature reduction could enhance label-free classification.  
 216 Figure 4(c-d) shows the results following the application of  
 217 the genetic algorithm, which automatically selected FSC-A,  
 218 SSC-A, FL3-A, FSC-H, and the width of the signal  
 219 as the most informative features. Down-selecting to these  
 220 most informative features resulted in a slightly smaller KS  
 221 distance (0.10 - 0.35) between measured and predicted  
 222 values of the lipid content for unlabeled cells. Extended  
 223 results are provided in supplementary Fig. S6.

224 During automated feature selection for linear regres-  
 225 sion (Fig. 4(c-d)), we did not incorporate higher order  
 226 effects (e.g., “interactions”) between predictor variables.  
 227 To enhance our modeling and potentially extract more

228 information from the data, we added an expanded set  
 229 of products of feature values to the input. As shown in  
 230 Fig. 4(e,f), expansion of the input matrix of features to  
 231 include quadratic and first order interaction terms, followed  
 232 by label-free feature selection via the genetic algorithm,  
 233 resulted in a slight improvement to label-free predictions  
 234 for the lipid content. For more detailed results after in-  
 235 troducing the quadratic features and application of the  
 236 genetic algorithm on higher order effects, see Fig. S7 in  
 237 the supplementary information. In this case, the genetic  
 238 algorithm identified the product of FSC-A and FL4-H, the  
 239 square of FSC-H, and the product of FL4-H and signal  
 240 width as the most informative attributes. Selected features  
 241 by the genetic algorithm on linear and quadratic features  
 242 are presented in more detail in supplementary Table S1.

243 Finally, we introduced a new strategy based on weighted

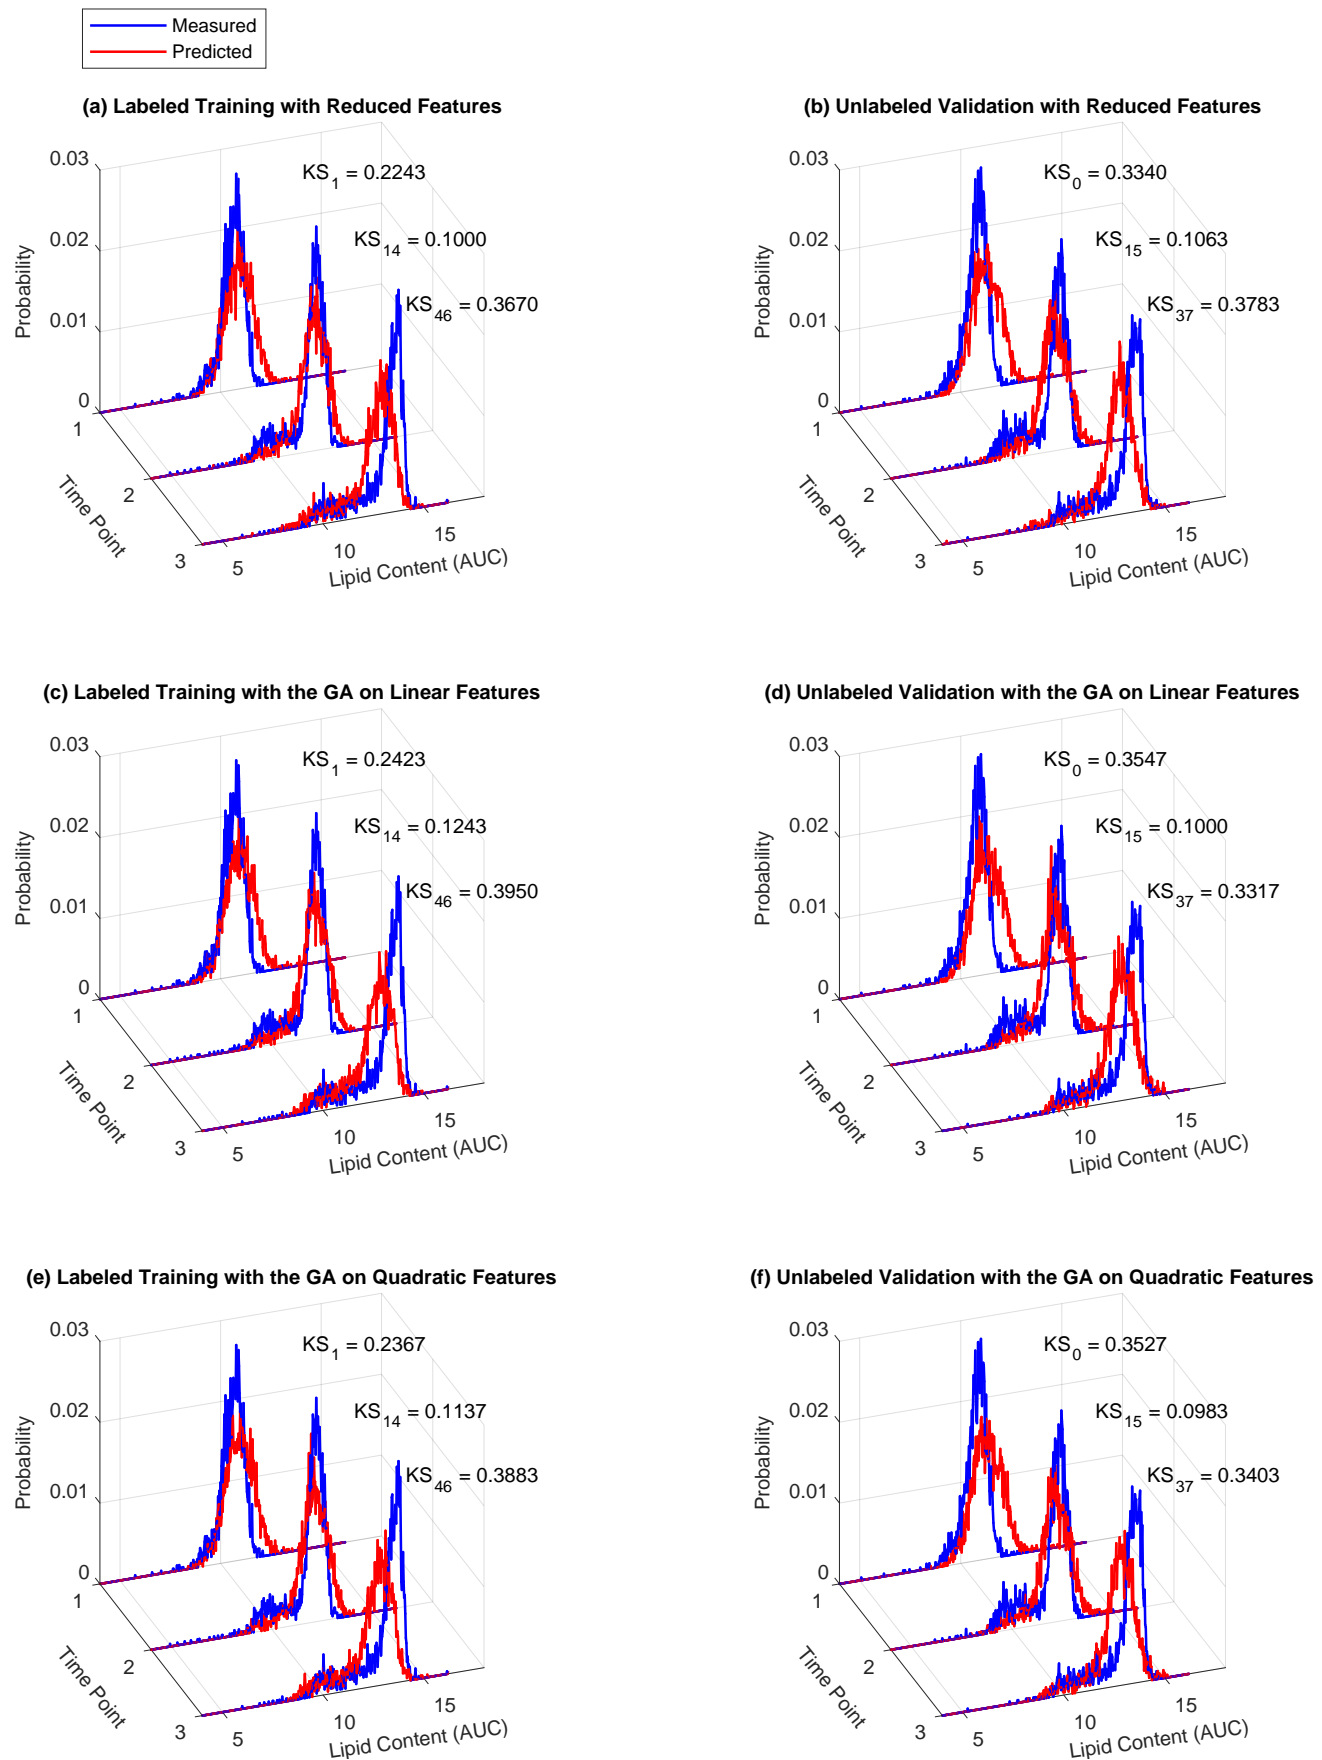

Fig. 4. Regression results after various approaches to feature selection. (a) Training on reduced features. (b) Validation of the model in (a) on unlabeled cells. (c) Training based on the features selected by the GA. (d) Validation of the model in (c) on unlabeled cells. (e) Training based on the features selected by the GA on quadratic features and interactions. (f) Validation of the model in (e) on unlabeled cells. For all cases, measured values are shown in blue and predicted in red. Kolmogorov-Smirnov distances between distributions are shown. Training data corresponds to days 1, 14, and 46; validation data corresponds to days 0, 15, and 37.



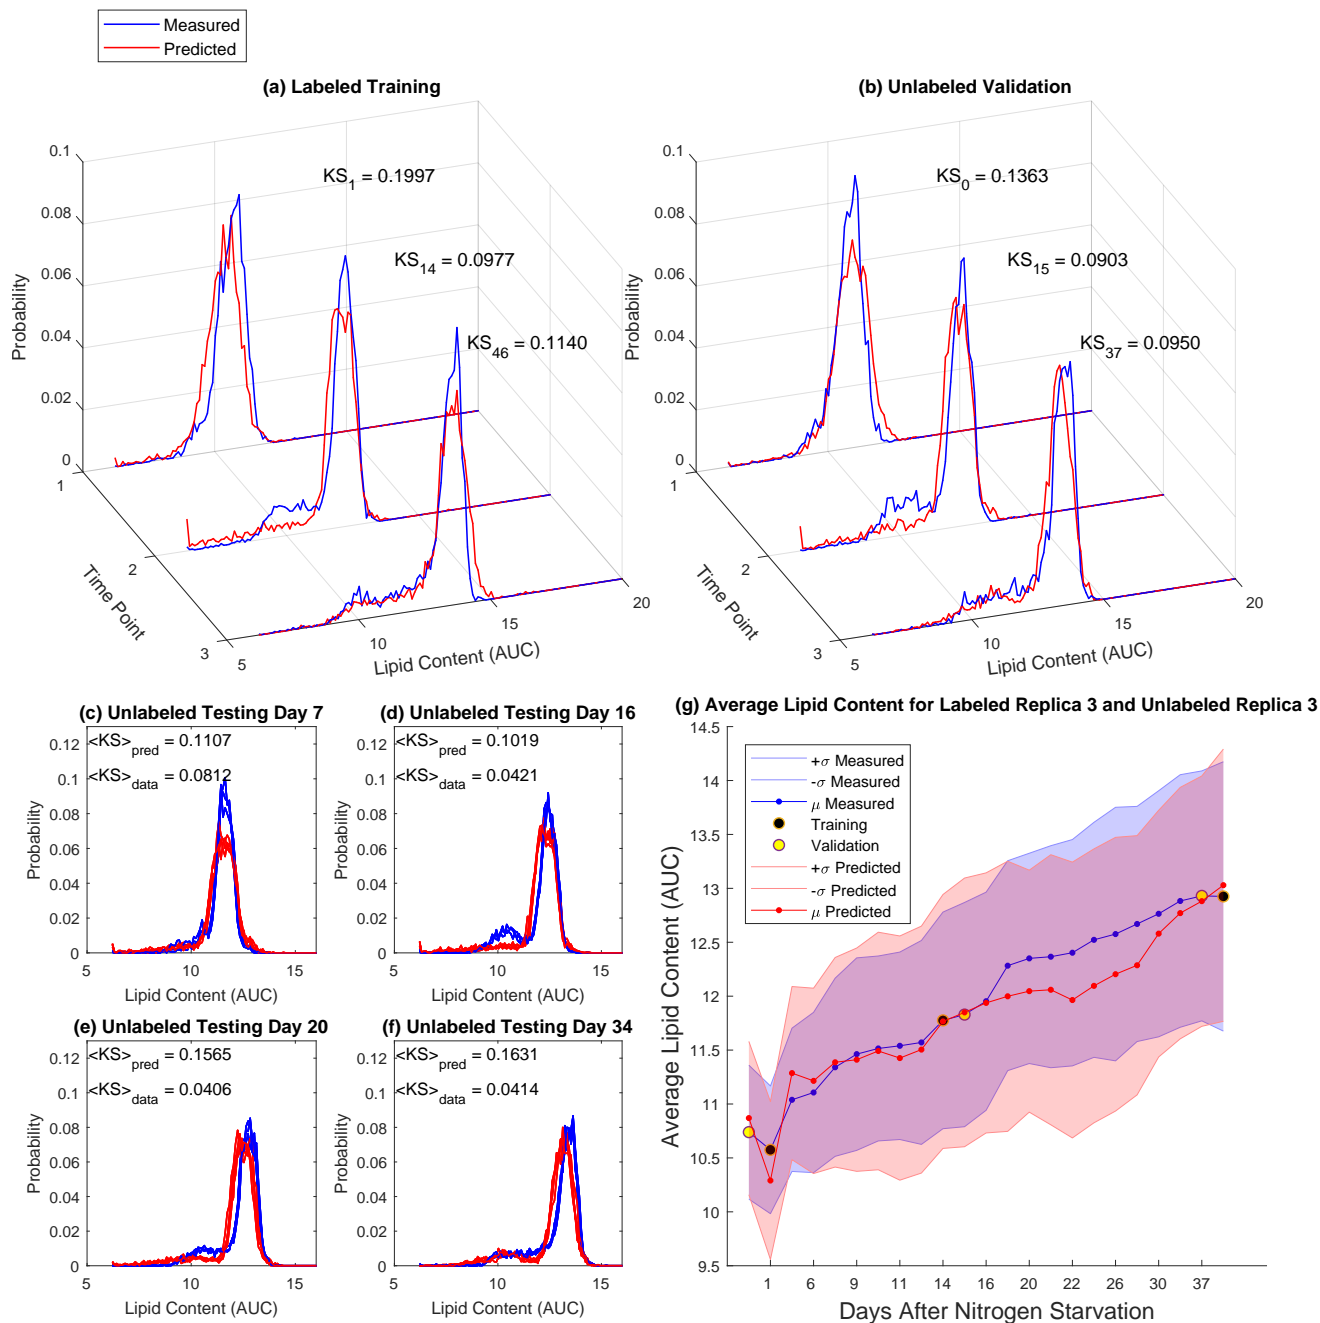

Fig. 5. Results of analysis. Distributions of lipid content for (a) labeled training data, and (b) unlabeled validation data. KS distances between distributions are shown. (c-f) Testing the final strategy on four unlabeled testing time points: Days 7, 16, 20, and 34. See Fig. S8 for corresponding results for all 17 testing time points. “KS data” is the average KS distance between measured lipid distributions. (g) Average lipid content at each day after nitrogen starvation. The blue and red shaded areas show the standard deviation as measured and predicted, respectively.

244 models (see Methods section). Our weighted model was  
 245 formed by a linear combination of three models, each  
 246 learned from labeled and unlabeled data at three training  
 247 time points. The weights applied to these three models were  
 248 estimated (using a secondary regression analysis) from  
 249 measured statistics of the *unlabeled features*. Importantly,  
 250 the re-weighting of the models allows incorporation of the  
 251 530/30 nm FCM channel, which was previously discarded  
 252 due to the fact that it was needed for the measurement of  
 253 BODIPY in the labeled cells.

Figure 5 shows the results of our new label-free quanti-  
 fication strategy for labeled cells (Fig. 5(a)) and unlabeled  
 cells (Fig. 5(b-g)). It can be seen here that using a weighted  
 modeling strategy based on statistics of unlabeled features  
 enables the model to predict the BODIPY signal with a  
 remarkably high accuracy. The expanded weighted model  
 analysis allows for a substantially improved ability to  
 quantify lipid content for both labeled and unlabeled cells.  
 The very small KS distance (0.14, 0.09, and 0.09) on  
 the three validation time points represent an exceptional

254  
 255  
 256  
 257  
 258  
 259  
 260  
 261  
 262  
 263

264 success in predicting the BODIPY signals based on label-  
265 free measurements.

266 For the final machine learning model, the genetic algo-  
267 rithm selected the product of SSC-A and SSC-H, the square  
268 of FL3-A, the product of FL4-A and SSC-H, and square of  
269 FL3-H as the most informative features for the construction  
270 of the regression analyses at the three training time points.  
271 Table S1 of the supplementary information presents these  
272 selected features in detail. For the secondary regression  
273 analysis used to define the weights of the regression anal-  
274 yses, the optimum found by the genetic algorithm relied  
275 on statistical information from all fluorescence channels  
276 (including the 530/30 nm channels that was previously  
277 discarded during labeled cells measurements). The selected  
278 columns of the test statistic are presented in supplementary  
279 Table S2.

280 After we validated the final label-free lipid estimation  
281 model, we fixed all parameters and sought to test it for  
282 label-free quantification on a much larger set of time points.  
283 The final model yielded exceptional prediction accuracy of  
284 the BODIPY signal for this previously unseen testing data,  
285 as can be seen in the predicted distribution of lipid content  
286 at specific time points (Fig. 5(c-f) and supplementary  
287 Fig. S8). Figure 5(g) also shows that the trained model  
288 correctly quantified average and standard deviation of lipid  
289 accumulation (in log scale) at each day following nitrogen  
290 starvation.

### 291 III. CONCLUSIONS

292 Single-cell quantification and classification are crucial  
293 tasks in many biological and biomedical applications, and  
294 flow cytometry (FCM) is one of the most common tools  
295 used for these tasks. Computational strategies have substan-  
296 tial potential to identify label-free markers and mitigate the  
297 expense or disruptive effects of traditional FCM analyses.  
298 In this article, we have demonstrated the use of mathemati-  
299 cal tools and statistical methods, including regression analy-  
300 sis and machine learning to extract quantitative information  
301 from intrinsic properties of unlabeled cell populations. We  
302 discovered that computational classifiers that are learned  
303 using intrinsic features measured in labeled cell populations  
304 may appear to be highly predictive when compared to  
305 other labeled cells, but these same models may then fail  
306 dramatically when tested on truly label-free data (Figs.2  
307 and S2-S4).

308 The key to our integrated strategy is careful consid-  
309 eration of the variations within heterogeneous single-cell  
310 populations. Drawing inspiration from our past work to  
311 identify gene regulation models from single-cell distribu-  
312 tions [23,29,30], we reasoned that distributions of labeled  
313 and unlabeled cell populations should have shared statistics  
314 that could help to circumvent the issue of data corruption  
315 due to label applications. Under that inspiration, we devel-  
316 oped a multi-stage regression approach that incorporates  
317 collections of both labeled and unlabeled data in the same  
318 conditions. From these data sets, we learn which features'  
319 statistics are conserved, which features vary between dif-

ferent treatments, and which features are most valuable  
to predict lipid content in unlabeled cells when trained  
using labeled cells. Figure 6 depicts a flow diagram of  
our new approach and its three main components of (i)  
linear regression applied to features and feature products to  
discover the correlations between intrinsic features and lipid  
content within labeled cells; (ii) genetic algorithms to auto-  
matically select features that contain useful information, but  
which avoid misleading or distracting artifacts contained  
within large FCM datasets; and (iii) a new model-weighting  
strategy to allow application of different statistical models  
in different situations.

The combination of regression analyses, genetic algo-  
rithms and model weighting approaches yields a final set of  
models and weights that are uniquely determined from the  
statistical properties of unlabeled cell population measure-  
ments. Using this approach, we can then extract sufficient  
information to provide efficient label-free quantification of  
lipid content in *Picochlorum soloecismus* over time during  
nitrogen starvation. Our final model accurately estimates  
lipid content distributions over time that span several orders  
of magnitude (Figs. 5 and S8). Moreover, although direct  
verification of lipid content for unlabeled single-cells is  
not possible, our final regression models preserved single-  
cell prediction accuracy for lipid content in labeled cells,  
especially at later time points when lipid content is highest  
(Pearson's correlation coefficient of  $R = 0.74-0.87$ ; see Fig.  
S8).

Together, the proposed computational tools could help  
circumvent the need for biochemical labels to reduce  
expense and open new avenues for single-cell research.  
For example, label-free quantification will be instrumental  
to sort cells into different subpopulations, without the  
(potentially terminal) cellular disruptions associated with  
standard biochemical markers. Once trained through several  
rounds of regression and genetic algorithms, our final model  
for algal lipid quantification reduces down to a simple  
linear operation applied to a handful of 7 second-order  
products of features of the unlabeled cells. Such operations  
are easily computed in less than a microsecond per cell,  
making the label-free analysis ideal for use in gating  
and sorting applications as a stand-in for fluorescence in  
fluorescence-activated cells sorting (FACS) analyses. Such  
populations could then be instrumental in future advanced  
studies such as analysis with subsequent growth assays,  
application to directed evolution to improve productivity  
or yield, exploration of additional perturbation responses,  
and other assays that require live, unmodified cells for  
subsequent analyses.

### 369 IV. METHODS

#### 370 A. Cell preparation and flow cytometry measurements

*P. soloecismus* was grown in f/2 media containing half the  
recipe nitrogen and using Instant Ocean sea salt (Blacksburg, VA)  
at 38 g/L [31,32]. Cultures were grown at room temperature on  
a 16 hour light/8 hour dark cycle and mixed by stirring. PH was  
maintained at 8.25 with on-demand CO<sub>2</sub> injection when the pH

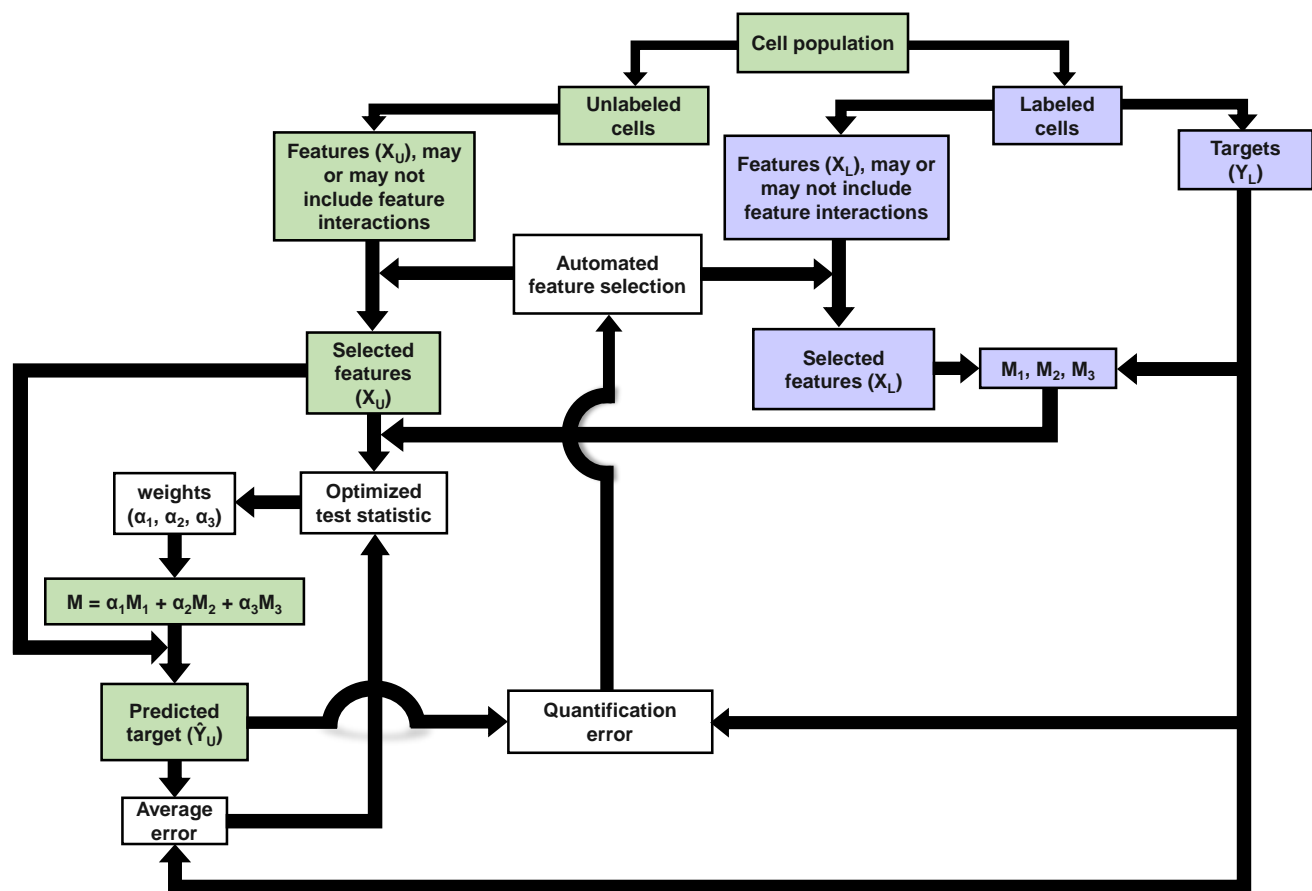

Fig. 6. Flow diagram of the final multi-stage label-free quantification strategy.

376 increased above the set-point. Cells were collected and stored at  
377 4 °C prior to analysis.

378 Stained populations of cells were incubated with 22.6 μM  
379 BODIPY 505/515 (Thermo Fisher Scientific) with 2.8% DMSO  
380 in media for 30 minutes at room temperature prior to analysis.  
381 Analysis was conducted using a BD Accuri™ C6 flow cytometer  
382 with BD CSampler™ (BD Biosciences). Unstained samples were  
383 collected with a set volume of 10 μl on a high flow rate (66  
384 μl/min), for stained samples 10,000 events were collected on a  
385 low flow rate (14 l/min). Data was exported in .csv format for  
386 subsequent analysis.

### 387 B. Linear regression analysis

In an initial attempt to identify label-free signatures of lipid content, we considered linear regression applied to match intrinsic features of labeled cells to lipid content (Fig. 1). In regression analysis, there are two main types of variables: the response variable (denoted  $y$ ) and the explanatory variables (the set of predictors, denoted  $\mathbf{x}$ ) [33]. In this study, the response vector is the accumulation of the lipid content for each cell (called the target) and the predictor is a matrix containing the data for intrinsic cellular properties measured by FSC, SSC, and other fluorescence wavelengths (called the features). In regression analysis, the response is approximated as a function of the predictors as

$$y_i = f(\mathbf{x}_i) + \varepsilon_i \quad (1)$$

where  $\mathbf{x}_i = (x_1, \dots, x_N)_i$  is the vector of  $N$  intrinsic features for the  $i^{\text{th}}$  cell, and  $\varepsilon_i$  is a random measurement error for that cell [34]. In linear regression, the response (target) and predictor

(feature) variables are assumed to satisfy the linear relationship [34]

$$\mathbf{Y} = \mathbf{X}\mathbf{M}, \quad (2)$$

where the vector  $\mathbf{Y} = [y_1, \dots, y_{N_c}]^T$  is the vector of targets for  $N_c$  training cells;  $\mathbf{X} = [\mathbf{x}_1^T, \dots, \mathbf{x}_{N_c}^T]^T$  is the corresponding matrix of features for the same cells; and  $\mathbf{M}$  is the regression parameter or regression coefficient. 388 389 390 391

Linear regression provides a preliminary insight about potential relationships between the predictor and the response variables. After defining the features and the target, the regression coefficient that minimizes the sum of squared difference of  $\|\mathbf{Y} - \mathbf{X}\mathbf{M}\|_2^2$  can be calculated as

$$\mathbf{M} = \mathbf{X}^{-L}\mathbf{Y} = (\mathbf{X}^T\mathbf{X})^{-1}\mathbf{X}^T\mathbf{Y}. \quad (3)$$

To perform a preliminary regression analysis, we first selected three *training* time points, corresponding to the lowest, the middle, and the highest BODIPY fluorescence intensities (in this experiment, days 1, 14, and 46, respectively). We chose these days to capture the greatest possible range of lipid accumulation phenotypes. For each time point, we considered FCM measurements from a random set of 3000 labeled cells. We computed the regression coefficient,  $\mathbf{M}$ , by Eq. (3) using the labeled data sets  $\mathbf{X}_L^{(\text{train})}$  and  $\mathbf{Y}_L^{(\text{train})}$ . Next, we selected another three *validation* time points, corresponding to the second lowest, another middle, and the second highest BODIPY fluorescence intensities (in this experiment, days 0, 15, and 37, respectively). This time, we extracted information for both labeled,  $\mathbf{X}_L^{(\text{valid})}$  and  $\mathbf{Y}_L^{(\text{valid})}$ , and unlabeled cells,  $\mathbf{X}_U^{(\text{valid})}$ . Using the  $\mathbf{M}$  computed from training data, we proceeded to predict the lipid content of the labeled 392 393 394 395 396 397 398 399 400 401 402 403 404 405 406



407 and unlabeled validation data sets by the regression coefficient  
408 computed previously.

### 409 C. Nonlinear approaches

To generalize our initial simple linear regression approach, we then added new features corresponding to all possible products of the individual features as follows:

$$y_i = f(x_1, x_2, \dots, x_N, x_1^2, x_2^2, \dots, x_{N-1}^2, x_N^2, x_1x_2, \dots, x_{N-1}x_N) + \varepsilon. \quad (4)$$

410 This expanded linear regression analysis, which uses all possible  
411 quadratic features, is referred to as the *quadratic* regression model.  
412 To further generalize the analysis, we also formulated a multilayer  
413 perceptron neural network (MLPNN) [28] and also applied the  
414 gradient boosting machine learning (GBML) method presented  
415 by Blasi et al. [12] to predict the BODIPY signals in our FCM  
416 measurements (see Figs. S2-S4 in the supplementary information  
417 for details).

### 418 D. Feature selection

419 To select the optimal features, we applied iterative training-  
420 validation strategies, in which we applied a fitness function  
421 based on *label-free measurements* to select the most informative  
422 features. To select the best combination of features we employed  
423 a supervised learning strategy, in which we used linear regression  
424 analysis with and without quadratic interaction terms to find  $\mathbf{M}$   
425 for a given feature set for training data, and we applied the genetic  
426 algorithm [35] to select the best combination of features to  
427 predict the validation data.

428 Direct measurement of lipid content is unavailable for unla-  
429 beled cells, so direct validation of label-free lipid predictions is  
430 not possible. However, since the labeled and unlabeled cells were  
431 sampled from the same original population and at the same time,  
432 we reasoned that the labeled and unlabeled populations should  
433 have the same distributions or statistics for their single-cell lipid  
434 levels. Therefore, to validate label-free predictions, we compare  
435 label-free distribution predictions to the labeled measurement  
436 distributions using the Kolmogorov-Smirnov statistic (KS), [36].  
437 The genetic algorithm was used to find the set of features that led  
438 to the smallest KS statistic for the unlabeled validation data.

439 We conducted all linear regression and genetic algorithm com-  
440 putations in MATLAB™ R2017b environment. For the MLPNN,  
441 computations were performed in Python 2.7 (see supplementary  
442 information for the MLPNN).

### 443 E. Weighted model

To further improve predictions of BODIPY signals for un-  
labeled cells, we considered a weighted model that could be  
learned from all measurement of unlabeled features, including  
the fluorescent channel in which BODIPY was measured in the  
labeled cells. To achieve this weighted model, we first learned  
three separate regression coefficients  $\mathbf{M}_1$ ,  $\mathbf{M}_2$ , and  $\mathbf{M}_3$  based on  
the three training time points (days 1, 14, and 46). While these  
models were fixed for all subsequent computations, we defined a  
combination model that could be formulated as a weighted sum:

$$\mathbf{M} = \alpha_1\mathbf{M}_1 + \alpha_2\mathbf{M}_2 + \alpha_3\mathbf{M}_3. \quad (5)$$

444 In the above equation,  $\mathbf{a} = [\alpha_1, \alpha_2, \alpha_3]$  contains the weights  
445 applied to their corresponding  $\mathbf{M}_i$ 's with respect to the measured  
446 unlabeled features. Hence, at each given time point, there is a  
447 unique weighted model  $\mathbf{M}$  based on fixed regression coefficients  
448  $\mathbf{M}_1$ ,  $\mathbf{M}_2$ , and  $\mathbf{M}_3$  and unlabeled features.

We then sought to learn a secondary model to estimate  
 $\mathbf{a}$  from populations of unlabeled data. We defined  $\mathbf{s}_r =$   
 $[\mu_1^{(r)}, \dots, \mu_n^{(r)}, \sigma_1^{(r)}, \dots, \sigma_n^{(r)}]$  as a vector that contains the pop-  
 ulation means and standard deviations of each feature (including

quadratic features) in any population of unlabeled cells. We  
then constructed the population sample statistics matrix  $\mathbf{S} =$   
 $[\mathbf{s}_1^T, \dots, \mathbf{s}_R^T]$  using  $R$  different randomly sampled sub-population  
 from the original training and validation data. For each  $r^{\text{th}}$   
 random population, we also performed a computational search  
 to find an optimized model scaling factor  $\mathbf{a}_r$  that yields the best  
 possible comparison between measured and predicted targets in  
 the training and validation data, and we collected these into the  
 matrix  $\mathbf{A} = [\mathbf{a}_1^T, \dots, \mathbf{a}_R^T]^T$ . With these definitions, we formulated  
 a secondary regression analysis for  $\mathbf{a}_r$  as a function of  $\mathbf{s}_r$  with  
 the assumed linear form

$$\mathbf{a}_r = \mathbf{s}_r\mathbf{Q} + \varepsilon, \quad (6)$$

for which we could estimate the weight quotient  $\mathbf{Q}$  as

$$\mathbf{Q} \approx \mathbf{S}^{-L}\mathbf{A}. \quad (7)$$

In this expression,  $\mathbf{Q}$  defines a relationship between the unlabeled  
 features (from computing  $\mathbf{s}$ ) and the weights ( $\mathbf{a}$ ). To prevent  
 overfitting in the determination of the weights, we generated  
 another set of random population samples from our training and  
 validation data, and we used the genetic algorithm to down select  
 among the best columns of  $\mathbf{S}$  (or rows of  $\mathbf{Q}$ ) to utilize for the  
 estimate of  $\mathbf{a}$ .

Once fixed using the training and validation data, the multi-  
 scale regression operators  $\mathbf{M}_1$ ,  $\mathbf{M}_2$ ,  $\mathbf{M}_3$  and  $\mathbf{Q}$  could be applied  
 to any new data sets  $\mathbf{X}_U$  and their summary statistics  $\mathbf{s}$  to calculate  
 $\mathbf{a} = \mathbf{s}\mathbf{Q}$ , estimate  $\mathbf{M}$  using Eqn. 5, and predict the lipid content  
 using Eqn. 2.

## 461 V. ACKNOWLEDGMENTS

Research reported in this publication was supported  
 by the National Institute of General Medical Sciences  
 of the National Institutes of Health under award number  
 R35GM124747.

## 466 REFERENCES

- [1] D. R. Gossett, W. M. Weaver, A. J. Mach, S. C. Hur, H. T. K. Tse, W. Lee, H. Amiri, and D. Di Carlo, "Label-free cell separation and sorting in microfluidic systems," *Analytical and bioanalytical chemistry*, vol. 397, no. 8, pp. 3249–3267, 2010.
- [2] Y. Han, Y. Gu, A. C. Zhang, and Y.-H. Lo, "Review: imaging technologies for flow cytometry," *Lab on a Chip*, vol. 16, no. 24, pp. 4639–4647, 2016.
- [3] Y. Saeyns, S. Van Gassen, and B. N. Lambrecht, "Computational flow cytometry: helping to make sense of high-dimensional immunology data," *Nature Reviews Immunology*, vol. 16, no. 7, pp. 449–462, 2016.
- [4] D. D. Carlo and L. P. Lee, "Dynamic single-cell analysis for quantitative biology," 2006.
- [5] N. Aghaepour, G. Finak, H. Hoos, T. R. Mosmann, R. Brinkman, R. Gottardo, R. H. Scheuermann, F. Consortium, D. Consortium et al., "Critical assessment of automated flow cytometry data analysis techniques," *Nature methods*, vol. 10, no. 3, p. 228, 2013.
- [6] G. Lee, W. Finn, and C. Scott, "Statistical file matching of flow cytometry data," *Journal of biomedical informatics*, vol. 44, no. 4, pp. 663–676, 2011.
- [7] M. Brown and C. Wittwer, "Flow cytometry: principles and clinical applications in hematology," *Clinical chemistry*, vol. 46, no. 8, pp. 1221–1229, 2000.
- [8] A. Adan, G. Alizada, Y. Kiraz, Y. Baran, and A. Nalbant, "Flow cytometry: basic principles and applications," *Critical reviews in biotechnology*, vol. 37, no. 2, pp. 163–176, 2017.
- [9] N. S. Barteneva, E. Fasler-Kan, and I. A. Vorobjev, "Imaging flow cytometry: coping with heterogeneity in biological systems," *Journal of Histochemistry & Cytochemistry*, vol. 60, no. 10, pp. 723–733, 2012.

- 497 [10] B. Rajwa, M. Venkatapathi, K. Ragheb, P. P. Banada, E. D. Hirlleman, 572  
498 T. Lary, and J. P. Robinson, "Automated classification of bacterial 573  
499 particles in flow by multiangle scatter measurement and support 574  
500 vector machine classifier," *Cytometry Part A*, vol. 73, no. 4, pp. 575  
501 369–379, 2008.
- 502 [11] K. Cheung, S. Gawad, and P. Renaud, "Impedance spectroscopy flow 576  
503 cytometry: on-chip label-free cell differentiation," *Cytometry Part A*, 577  
504 vol. 65, no. 2, pp. 124–132, 2005.
- 505 [12] T. Blasi, H. Hennig, H. D. Summers, F. J. Theis, J. Cerveira, J. O. 580  
506 Patterson, D. Davies, A. Filby, A. E. Carpenter, and P. Rees, "Label- 581  
507 free cell cycle analysis for high-throughput imaging flow cytometry," 582  
508 *Nature communications*, vol. 7, p. 10256, 2016.
- 509 [13] J. Yoon, Y. Jo, M.-h. Kim, K. Kim, S. Lee, S.-J. Kang, and 583  
510 Y. Park, "Identification of non-activated lymphocytes using three- 584  
511 dimensional refractive index tomography and machine learning," 585  
512 *Scientific reports*, vol. 7, no. 1, p. 6654, 2017.
- 513 [14] B. Wollscheid, D. Bausch-Fluck, C. Henderson, R. O'brien, 586  
514 M. Bibel, R. Schiess, R. Aebersold, and J. D. Watts, "Mass- 587  
515 spectrometric identification and relative quantification of n-linked 588  
516 cell surface glycoproteins," *Nature biotechnology*, vol. 27, no. 4, p. 589  
517 378, 2009.
- 518 [15] C. L. Chen, A. Mahjoubfar, L.-C. Tai, I. K. Blaby, A. Huang, K. R. 590  
519 Niazi, and B. Jalali, "Deep learning in label-free cell classification," 591  
520 *Scientific reports*, vol. 6, p. 21471, 2016.
- 521 [16] S. E. Boddington, E. J. Sutton, T. D. Henning, A. J. Nedopil, 592  
522 B. Sennino, A. Kim, and H. E. Daldrup-Link, "Labeling human 593  
523 mesenchymal stem cells with fluorescent contrast agents: the bio- 594  
524 logical impact," *Molecular Imaging and Biology*, vol. 13, no. 1, pp. 595  
525 3–9, 2011.
- 526 [17] B. Guo, C. Lei, H. Kobayashi, T. Ito, Y. Yalikun, Y. Jiang, Y. Tanaka, 596  
527 Y. Ozeki, and K. Goda, "High-throughput, label-free, single-cell, 597  
528 microalgal lipid screening by machine-learning-equipped optoflu- 598  
529 idic time-stretch quantitative phase microscopy," *Cytometry Part A*, 599  
530 vol. 91, no. 5, pp. 494–502, 2017.
- 531 [18] J. Rumin, H. Bonnefond, B. Saint-Jean, C. Rouxel, A. Sciandra, 600  
532 O. Bernard, J.-P. Cadoret, and G. Bougaran, "The use of fluorescent 601  
533 Nile red and bodipy for lipid measurement in microalgae," *Biotech- 602  
534 nology for biofuels*, vol. 8, no. 1, p. 42, 2015.
- 535 [19] J. T. Cirulis, B. C. Strasser, J. A. Scott, and G. M. Ross, "Optimiza- 603  
536 tion of staining conditions for microalgae with three lipophilic dyes 604  
537 to reduce precipitation and fluorescence variability," *Cytometry Part 605  
538 A*, vol. 81, no. 7, pp. 618–626, 2012.
- 539 [20] R. Alford, H. M. Simpson, J. Duberman, G. C. Hill, M. Ogawa, 606  
540 C. Regino, H. Kobayashi, and P. L. Choyke, "Toxicity of organic 607  
541 fluorophores used in molecular imaging: literature review," *Molecu- 608  
542 lar imaging*, vol. 8, no. 6, pp. 7290–2009, 2009.
- 543 [21] H. Hennig, P. Rees, T. Blasi, L. Kametsky, J. Hung, D. Dao, A. E. 609  
544 Carpenter, and A. Filby, "An open-source solution for advanced 610  
545 imaging flow cytometry data analysis using machine learning," 611  
546 *Methods*, vol. 112, pp. 201–210, 2017.
- 547 [22] P. Eulenbergh, N. Köhler, T. Blasi, A. Filby, A. E. Carpenter, P. Rees, 612  
548 F. J. Theis, and F. A. Wolf, "Reconstructing cell cycle and disease 613  
549 progression using deep learning," *Nature communications*, vol. 8, 614  
550 no. 1, p. 463, 2017.
- 551 [23] B. Munskey, G. Neuert, and A. van Oudenaarden, "Using gene 615  
552 expression noise to understand gene regulation," *Science*, vol. 336, 616  
553 no. 6078, pp. 183–187, 2012.
- 554 [24] P. Biller, R. Riley, and A. Ross, "Catalytic hydrothermal processing 617  
555 of microalgae: decomposition and upgrading of lipids," *Bioresource 618  
556 technology*, vol. 102, no. 7, pp. 4841–4848, 2011.
- 557 [25] H. K. Reddy, T. Muppaneni, J. Rastegary, S. A. Shirazi, A. Ghas- 619  
558 semi, and S. Deng, "Asi: Hydrothermal extraction and characteriza- 620  
559 tion of bio-crude oils from wet chlorella sorokiniana and dunaliella 621  
560 tertiolecta," *Environmental Progress & Sustainable Energy*, vol. 32, 622  
561 no. 4, pp. 910–915, 2013.
- 562 [26] J. Rastegary, S. A. Shirazi, T. Fernandez, and A. Ghassemi, "Water 623  
563 resources for algae-based biofuels," *Journal of Contemporary Water 624  
564 Research & Education*, vol. 151, no. 1, pp. 117–122, 2013.
- 565 [27] C. J. Unkefer, R. T. Sayre, J. K. Magnuson, D. B. Anderson, 625  
566 I. Baxter, I. K. Blaby, J. K. Brown, M. Carleton, R. A. Cattolico, 626  
567 T. Dale *et al.*, "Review of the algal biology program within the 627  
568 national alliance for advanced biofuels and bioproducts," *Algal 628  
569 Research*, vol. 22, pp. 187–215, 2017.
- 570 [28] C. M. Bishop, *Pattern recognition and machine learning*. Springer, 629  
571 2006.
- 572 [29] B. Munskey, G. Li, Z. R. Fox, D. P. Shepherd, and G. Neuert, 630  
573 "Distribution shapes govern the discovery of predictive models for 631  
574 gene regulation," *Proceedings of the National Academy of Sciences*, 632  
575 vol. 115, no. 29, pp. 7533–7538, 2018.
- 576 [30] G. Neuert, B. Munskey, R. Z. Tan, L. Teytelman, M. Khamash, and 633  
577 A. van Oudenaarden, "Systematic identification of signal-activated 634  
578 stochastic gene regulation," *Science*, vol. 339, no. 6119, pp. 584– 635  
579 587, 2013.
- 580 [31] R. R. Guillard, "Culture of phytoplankton for feeding marine in- 636  
581 vertebrates," in *Culture of marine invertebrate animals*. Springer, 637  
582 1975, pp. 29–60.
- 583 [32] R. R. Guillard and J. H. Ryther, "Studies of marine planktonic 638  
584 diatoms: I. cyclotella nana hustedt, and detonula confervacea (cleve) 639  
585 gran." *Canadian journal of microbiology*, vol. 8, no. 2, pp. 229–239, 640  
586 1962.
- 587 [33] G. A. Seber and A. J. Lee, *Linear regression analysis*. John Wiley 641  
588 & Sons, 2012, vol. 329.
- 589 [34] S. Chatterjee and A. S. Hadi, *Regression analysis by example*. John 642  
590 Wiley & Sons, 2015.
- 591 [35] M. Mitchell, *An Introduction to Genetic Algorithms*, ser. Complex 643  
592 Adaptive Systems. MIT Press, 2014. [Online]. Available: <https://books.google.com/books?id=3ezAoQEACAAJ> 644
- 593 [36] R. H. Lopes, "Kolmogorov-smirnov test," in *International Encyclo- 645  
594 pedia of Statistical Science*. Springer, 2011, pp. 718–720. 646  
595
